# Supplementary material
Source: HighWire-hosted journal article supplement (http://dmd.aspetjournals.org/highwire/filestream/82198/field_highwire_adjunct_files/0/1565_supp_data.pdf)
Supplement: 1565_supp_data.pdf [file 1565_supp_data.pdf]

Activation of Cryptic Donor Splice Sites Within the UGT1A First-Exon Region Generates Variant Transcripts That Encode UGT1A Proteins With Truncated Aglycone-binding Domains  
Dong Gui Hu, Shashikanth Marri, Julie-Ann Hulin, Radwan Ansaar, Peter I. Mackenzie, Ross A. McKinnon, and Robyn Meech

### Legends of Supplemental Figures

**Supplemental Fig. 1. Sequences of variant UGT1A first exons.** Shown are the sequences for eight variant UGT1A first exons that are generated using cryptic donor sites within the UGT1A first-exon region, including *1A1E1v* (A), *1A3E1v1* (B), *1A3E1v2* (C), *1A4E1v* (D), *1A5E1v* (E), *1A8E1v* (F), *1A9E1v* (G), *1A10E1v* (H). The nucleotide sequences of variant first exons (BLUE) are positioned at the right according to the human GRCh38/hg38 genome assembly. The start ATG codons and the dinucleotide GT splice signals of the novel cryptic donor splice sites are also indicated.

**Supplemental Fig. 2. Predicted sequences for variant UGT1A proteins.** Shown are the sequences for eight predicted UGT1A variant proteins, including 1A1\_in1 (A), 1A3\_in3 (B), 1A3\_in4 (C), 1A4\_in4 (D), 1A5\_in1 (E), 1A8\_in2 (F), 1A9\_in2 (G), and 1A10\_in7 (H). The sequences encoded by the first exons and exons 2-5 are indicated in BLUE and RED, respectively. 1A3\_in3 has a novel 77-aa C-terminal peptide (GREEN) but lacks the sequence encoded by exons 2-5.

**Supplemental Figure 3. Sequence reads for variant UGT1A transcripts.** Shown are the sequence reads (100 nucleotides) for variant transcripts 1A4\_n4 (A), 1A8\_n2 (B) and 1A9\_n2 (C) identified from the UGT-enriched CaptureSeq datasets (GSE80463) using transcript-specific probes and the Sequence Read Archive (SRA) platform. The transcript-specific splice

junctions are indicated by a vertical RED line. The nucleotide positions of the 3' ends of the three variant first exons (1A4E1v, 1A8E1v, 1A9E1v) are also indicated.

**Supplemental Fig. 4. Expression of variant transcripts 1A8\_n2 and 1A9\_n2 in normal and drug-metabolizing tissues.** Using transcript-specific probes and the Sequence Read Archive (SRA) platform, the sequence reads of canonical (1A8\_v1, 1A9\_v1) and variant (1A8\_n2, 1A9\_n2) transcripts were identified in fifteen CaptureSeq samples (GSE80463) generated from normal and cancerous drug-metabolizing tissues as indicated. The number of sequence reads for each transcript was normalized using the number of total sequence reads in the same sample and then presented as the relative reads of this transcript per  $10^9$  reads of the total sequence reads. Shown are the expression level of 1A8\_n2 (A), 1A9\_n2 (C), and the expression ratio for 1A8\_n2/1A8\_v1 (B), or 1A9\_n2/1A9\_v1 (D) in fifteen CaptureSeq samples.

**Supplemental Figure 5. Variant UGT1A transcripts and proteins.** (A) RT-PCR was conducted using cDNA samples of colorectal cancer HT-29 cells and primers to clone the full coding sequence of canonical UGT1A8 mRNA (1A8\_v1) or UGT1A10 mRNA (1A10\_v1). The resultant amplicons were run on an ethidium-bromide-stained agarose gel and imaged using UV-illumination. (B) HEK293T cells were transfected with constructs expressing no UGT protein (control), wildtype (1A8\_i1) and variant (1A8\_i3) UGT1A8 proteins alone and in combination (1A8\_i1 + 1A8\_i3) as indicated. Lysates of transfected cells were subjected to standard Western blotting assays using a pan-UGT1A antibody and imaged using chemiluminescent agents as described in *Materials and Methods*. (C) Glucuronidation of HEK293T lysates transfected with vectors expression 1A8\_i1 or 1A8\_i3 alone and in combination were conducted using HPLC assays. The activity of 4MU glucuronidation was

normalized to the band intensities of western blots obtained using equal amounts of HEK293T lysates of the same samples used for 4MU activity assays as described in *Materials and Methods*. Shown is the mean plus SD of 4MU-glucuronidation activity of 1A8\_i1/\_i3-transfected cells normalized to that of 1A8\_i1-transfected cells (set as a value of 100%) from three independent experiments. Student's t-test,  $p < 0.05$  is considered statistically significant.

**Supplemental Fig. 6. Sequencing results identified the 1A8\_n2 transcript in HT-29 cells.**

The 1A8\_n2 transcript has a variant first exon (*1A8E1v*) and common UGT1A exons 2-5. Shown are the sequencing chromatograms of a cloned pEF\_IRESpuro6 construct from the HT-29 cell line that contains the 1A8\_n2 transcript-specific splice junction (1A8E1v/1AE2) and all other four UGT1A common splice junctions [1AE2/1AE3, 1AE3/1AE4, 1AE4/1AE5]. All splice junctions are indicated by a vertical line. nt: nucleotide; AA: amino acid.

**Supplemental Fig. 7. Sequencing results identified the 1A10\_n7 transcript in HT-29 cells.**

The 1A10\_n7 transcript has a variant first exon (*1A10E1v*) and common UGT1A exons 2-5. Shown are the sequencing chromatograms of a cloned pEF\_IRESpuro6 construct from the HT-29 cell line that contain the 1A10\_n7 transcript-specific splice junction (1A10E1v/1AE2) and all UGT1A common splice junctions [1AE2/1AE3, 1AE3/1AE4, 1AE4/1AE5]. All splice junctions are indicated by a vertical line. nt: nucleotide; AA: amino acid

**Supplemental Fig. 8. Variant transcripts UGT1A8\_n2 and UGT1A10\_n7 generated using novel cryptic donor splice sites within UGT1A first exons in colorectal cancer HT-29 cells.**

(A) Shown are the exon structures of the UGT1A8 pre-mRNA (Aa), mRNA (1A8\_v1) (Ab), and variant transcript (1A8\_n2). Pre-mRNA splicing using the 1A8 canonical and cryptic donor splice sites generates 1A8 mRNA (1A8\_v1) (Ab) and variant 1A8\_n2 (Ac), respectively. (B)

Shown are the exon structures of the UGT1A10 pre-mRNA (Ba), mRNA (1A10\_v1) (Bb), and variant transcript (1A10\_n7). Pre-mRNA splicing using the 1A10 canonical and cryptic donor splice sites generates 1A10 mRNA (1A10\_v1) (Bb) and variant 1A10\_n7 (Bc), respectively. The sequencing results covering the 1A8\_n2 (Ad) or 1A10\_n7 (Bd) novel splice junction are also shown. The donor and acceptor splice signal dinucleotides are indicated GT and AG, respectively.

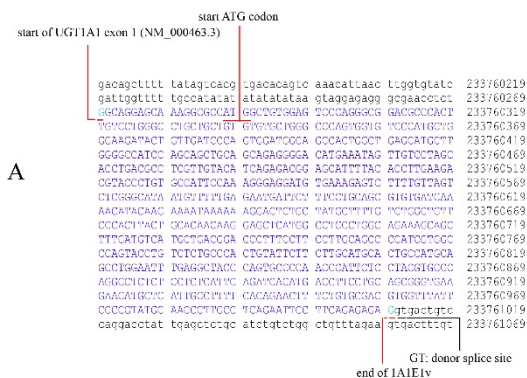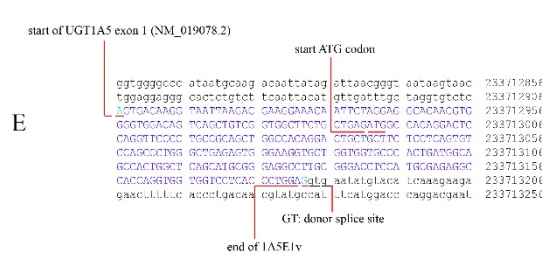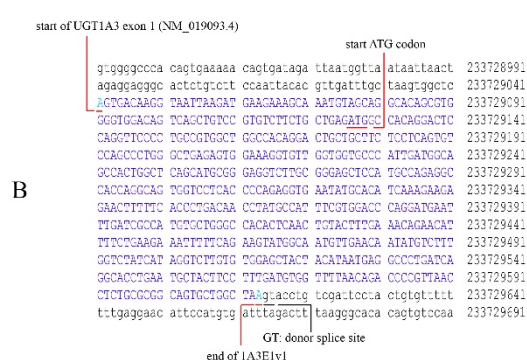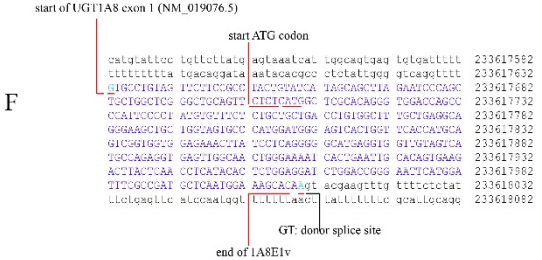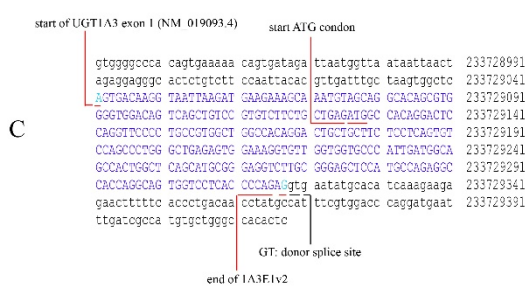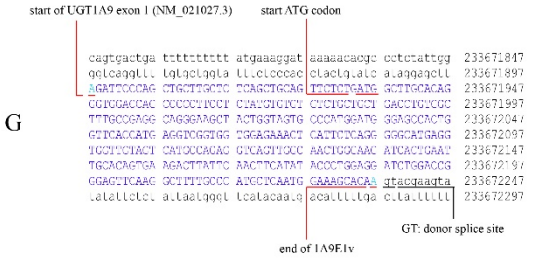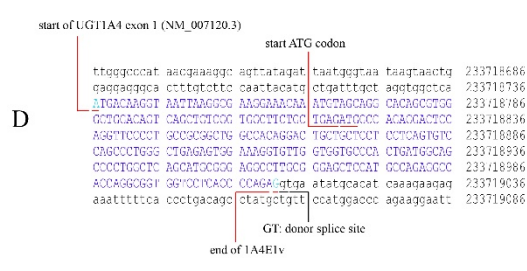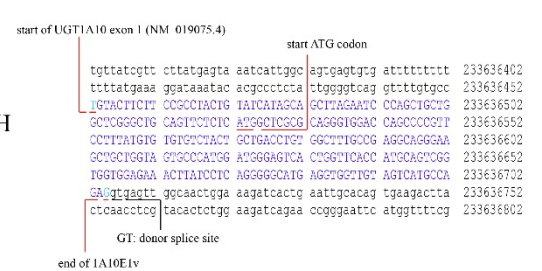

Supplemental Fig. 1

- Protein predicted from transcript 1A1\_n1 (487 aa)**  
 MAVESQGGRPVLVGLLLCVLGPVVSAGKILLIPVDGSHWLSMLGAIQQLQQRGHEIVVLAPDASLYIRDGAFYTLKTYVPVFPQREDVKE  
 SFVSLGHNVFENDSEFLQRVIKTYKKIKKDSAMLLSGCSHLLHNKELMASLAESSFDVMLTDPFLPCSPIVAQYLSLPTVFFLHALPCSLE  
 FEATQCPNPFYSYVPRPLSSHSDHMTFLQRVKNMLIAFSQNFCDVVYSPYATLASEFLQREEF~~EAY~~INASGEHGIVVFSLGSMVSEIPEK  
 KAMAIADALGKIPQTVLWRYTGTRPSNLANNTILVKWLPQNDLLGHPMTRAFITHAGSHGVYESICNGVPMVMMPFLFGDQMDNAKRMETK  
 GAGVTLNVLEMTSEDLLENALKAVINDKSYKENIMRLSSLHKDRPVEPLDLAVFWVEFVMRHKGAPHLRPAAHDLTWYQYHSLDVI~~GFLLA~~  
 VVLTVAFITFKCCAYGYRKCLGKKGRVKKAHKSKTH
- Protein predicted from transcript 1A3\_n3 (239 aa)**  
 MATGLQVPLPWLATGLLLLLSVQPWAESGKVLVVPIDGSHWLSMREVLRELHARGHQAVVLTPEVNMHIKEENFTLTYYAISWTQDEFD  
 RHLVGHGTQLYFETEHFLKFFRSMAMLNMSLVYHRSCVELLHNEALIRHLNATSFVVLTDVNLCAAVLAKNLKPTLMLLENMELWFS  
 LWDQWSQKQRRKLWQLLMLWAKSLRQSCGGTLEPDHRILRTRTRYLLSGYPKTI~~CLVTR~~
- Predicted protein from transcript 1A3\_n4 (309 aa)**  
 MATGLQVPLPWLATGLLLLLSVQPWAESGKVLVVPIDGSHWLSMREVLRELHARGHQAVVLTPE~~E~~FEAYINASGEHGIVVFSLGSMVSEI  
 PEKKAMAIADALGKIPQTVLWRYTGTRPSNLANNTILVKWLPQNDLLGHPMTRAFITHAGSHGVYESICNGVPMVMMPFLFGDQMDNAKRM  
 ETKGAGVTLNVLEMTSEDLLENALKAVINDKSYKENIMRLSSLHKDRPVEPLDLAVFWVEFVMRHKGAPHLRPAAHDLTWYQYHSLDVI~~G~~  
 LLAVVLTVAFITFKCCAYGYRKCLGKKGRVKKAHKSKTH
- Predicted protein from transcript 1A4\_n4 (309 aa)**  
 MARGLQVPLPRLATGLLLLLSVQPWAESGKVLVVPIDGSPWLSMREALRELHARGHQAVVLTPE~~E~~FEAYINASGEHGIVVFSLGSMVSEI  
 PEKKAMAIADALGKIPQTVLWRYTGTRPSNLANNTILVKWLPQNDLLGHPMTRAFITHAGSHGVYESICNGVPMVMMPFLFGDQMDNAKRM  
 ETKGAGVTLNVLEMTSEDLLENALKAVINDKSYKENIMRLSSLHKDRPVEPLDLAVFWVEFVMRHKGAPHLRPAAHDLTWYQYHSLDVI~~G~~  
 LLAVVLTVAFITFKCCAYGYRKCLGKKGRVKKAHKSKTH
- Predicted protein from transcript 1A5\_n1 (309 aa)**  
 MATGLQVPLPQLATGLLLLLSVQPWAESGKVLVVPIDGSHWLSMREALRDLHARGHQVVVLTLEE~~E~~FEAYINASGEHGIVVFSLGSMVSEI  
 PEKKAMAIADALGKIPQTVLWRYTGTRPSNLANNTILVKWLPQNDLLGHPMTRAFITHAGSHGVYESICNGVPMVMMPFLFGDQMDNAKRM  
 ETKGAGVTLNVLEMTSEDLLENALKAVINDKSYKENIMRLSSLHKDRPVEPLDLAVFWVEFVMRHKGAPHLRPAAHDLTWYQYHSLDVI~~G~~  
 LLAVVLTVAFITFKCCAYGYRKCLGKKGRVKKAHKSKTH
- Predicted proetin (termed 1A8\_i3) from transcript 1A8\_n2 (346 aa)**  
 MARTGWTSPIPLCVSLLLTGFAEAGKLLVVPMDGSHWFTMQSVVEKLILRGHEVVVVMPEVSWQLGKSLNCTVKTYSTSYTLEDLDREF  
 MDFADAQWKAQEF~~EAY~~INASGEHGIVVFSLGSMVSEIPEKKAMAIADALGKIPQTVLWRYTGTRPSNLANNTILVKWLPQNDLLGHPMTR  
 AFITHAGSHGVYESICNGVPMVMMPFLFGDQMDNAKRMETKGAGVTLNVLEMTSEDLLENALKAVINDKSYKENIMRLSSLHKDRPVEPLDL  
 AVFWVEFVMRHKGAPHLRPAAHDLTWYQYHSLDVI~~GFLLA~~VVLTVAFITFKCCAYGYRKCLGKKGRVKKAHKSKTH
- Predicted protein from transcript 1A9\_n2 (346 aa)**  
 MACTGWTSPLPLCVCLLLTCGFAEAGKLLVVPMDGSHWFTMRSVVEKLILRGHEVVVVMPEVSWQLGRSLNCTVKTYSTSYTLEDLDREF  
 KAFAHAQWKAQEF~~EAY~~INASGEHGIVVFSLGSMVSEIPEKKAMAIADALGKIPQTVLWRYTGTRPSNLANNTILVKWLPQNDLLGHPMTR  
 AFITHAGSHGVYESICNGVPMVMMPFLFGDQMDNAKRMETKGAGVTLNVLEMTSEDLLENALKAVINDKSYKENIMRLSSLHKDRPVEPLDL  
 AVFWVEFVMRHKGAPHLRPAAHDLTWYQYHSLDVI~~GFLLA~~VVLTVAFITFKCCAYGYRKCLGKKGRVKKAHKSKTH
- Predicted protein(termed 1A10\_i3) from transcript 1A10\_n7(306 aa)**  
 MARAGWTSVPVPLCVCLLLTCGFAEAGKLLVVPMDGSHWFTMQSVVEKLILRGHEVVVVMPEE~~EAY~~INASGEHGIVVFSLGSMVSEIPEK  
 KAMAIADALGKIPQTVLWRYTGTRPSNLANNTILVKWLPQNDLLGHPMTRAFITHAGSHGVYESICNGVPMVMMPFLFGDQMDNAKRMETK  
 GAGVTLNVLEMTSEDLLENALKAVINDKSYKENIMRLSSLHKDRPVEPLDLAVFWVEFVMRHKGAPHLRPAAHDLTWYQYHSLDVI~~GFLLA~~  
 VVLTVAFITFKCCAYGYRKCLGKKGRVKKAHKSKTH

Supplemental Fig. 2



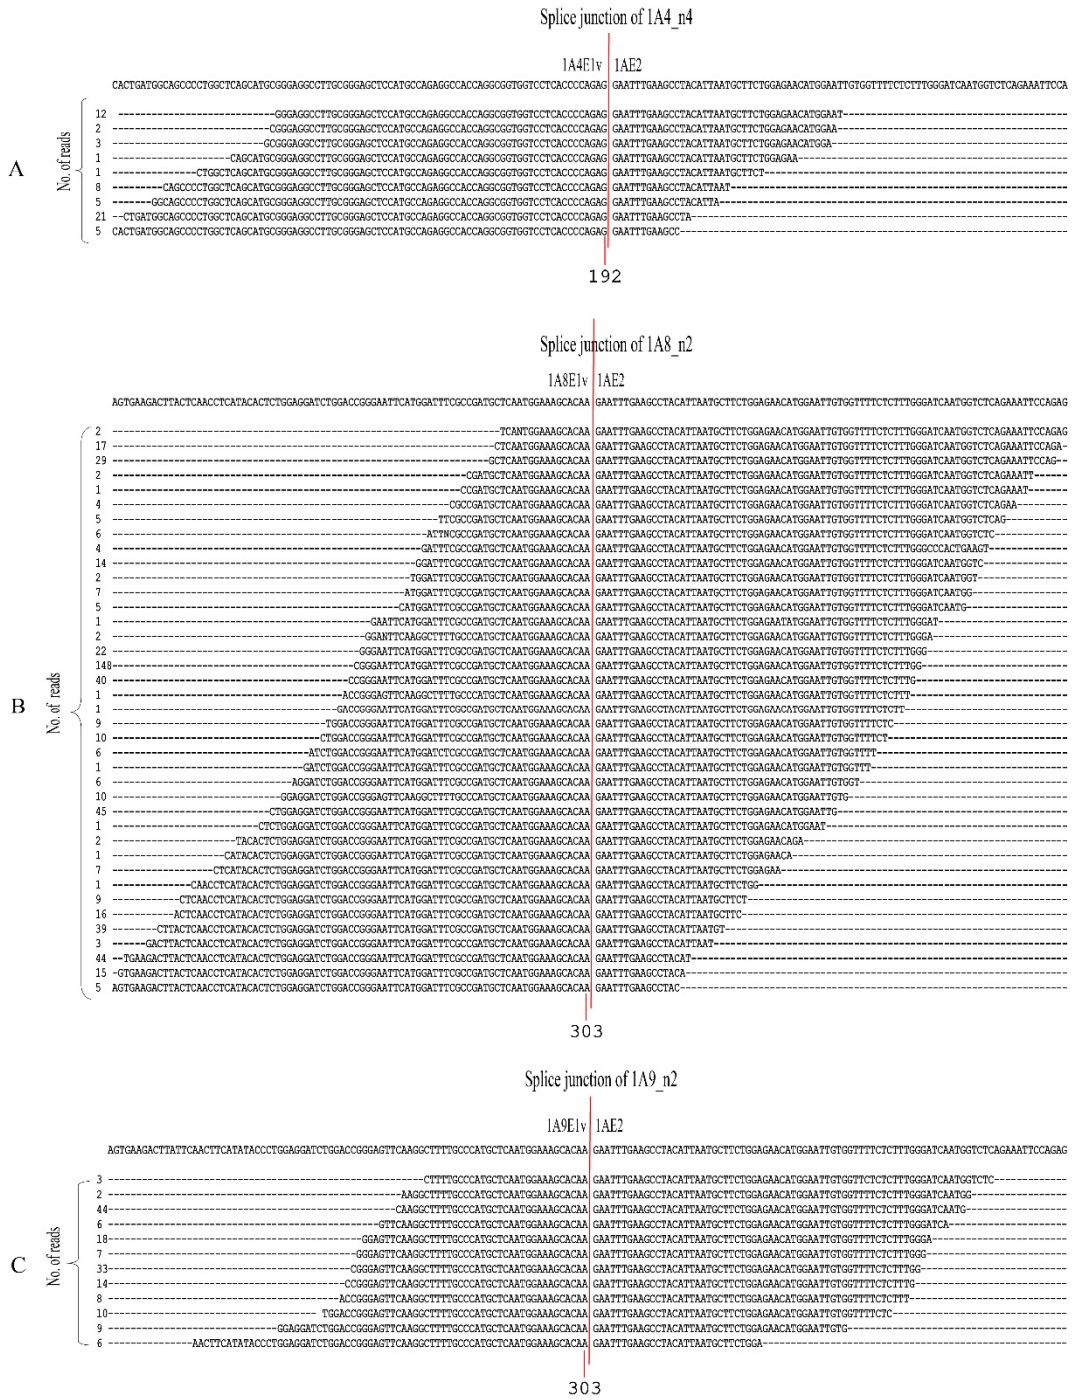

Supplemental Fig. 3.

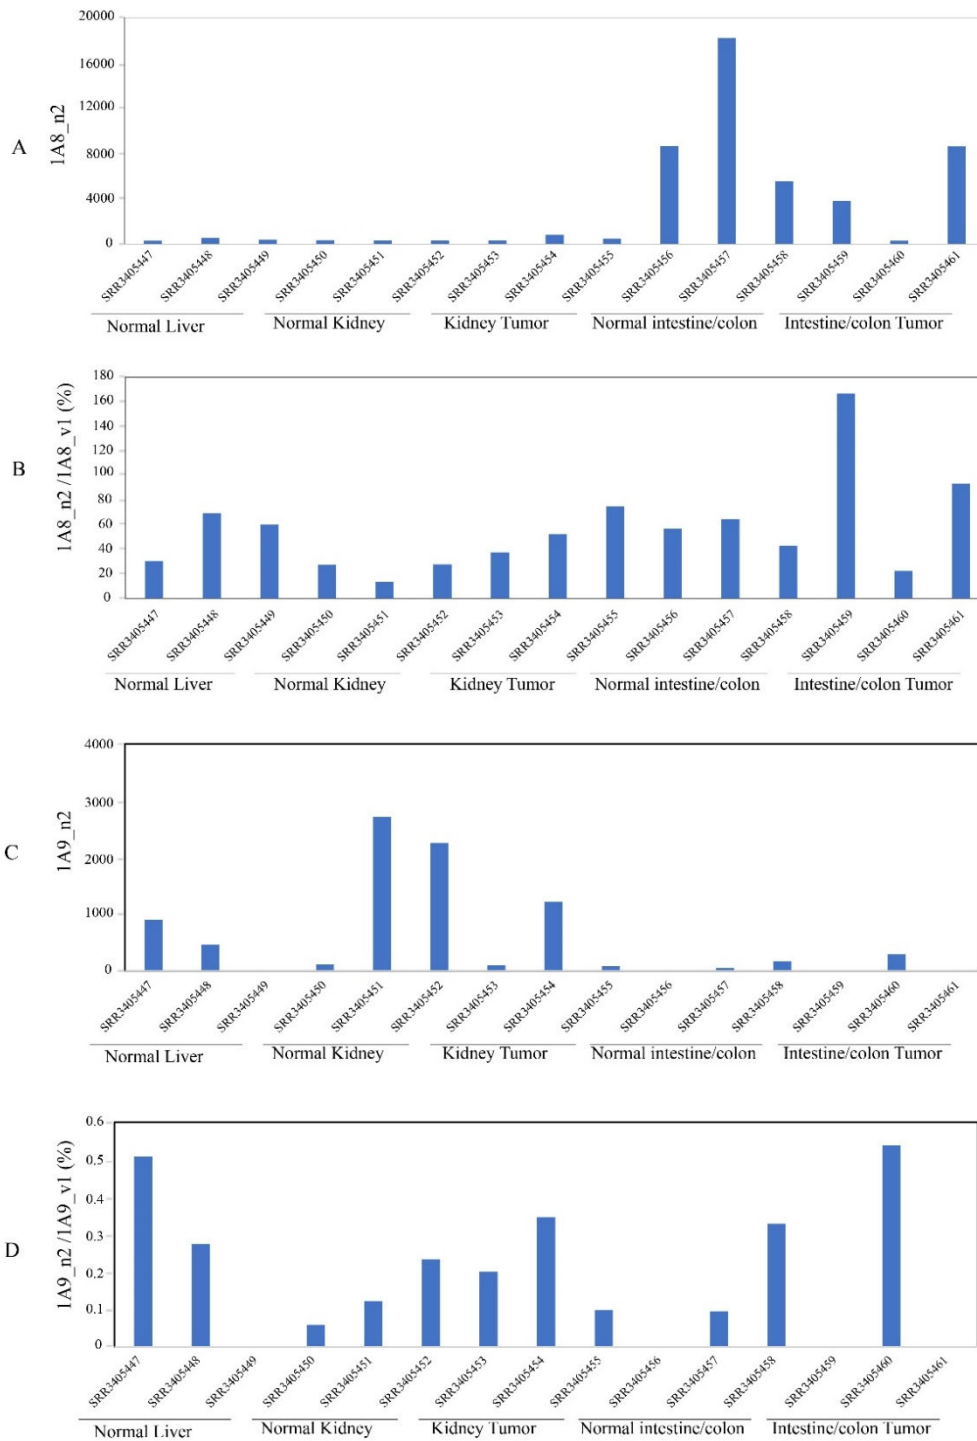

Supplemental Fig. 4.



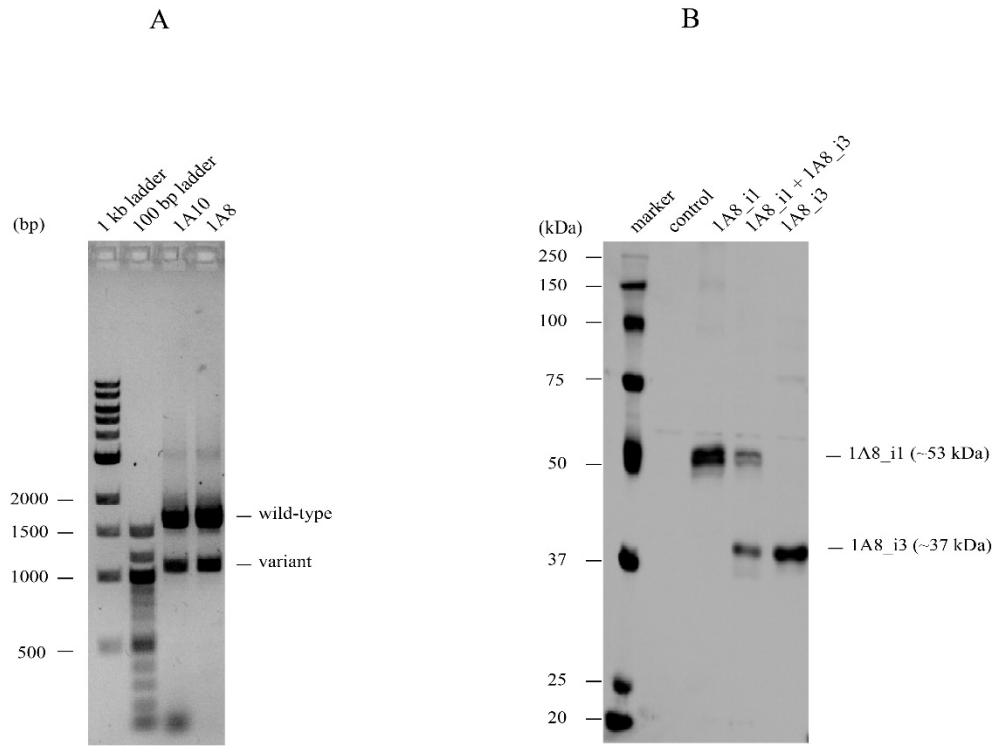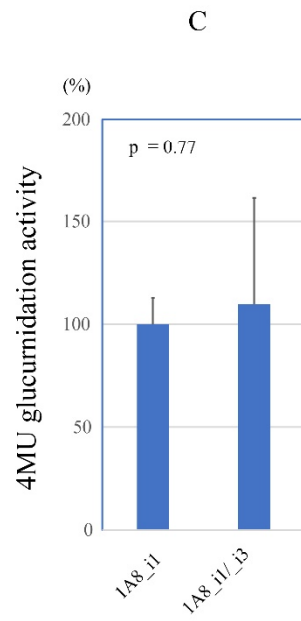

Supplemental Fig. 5

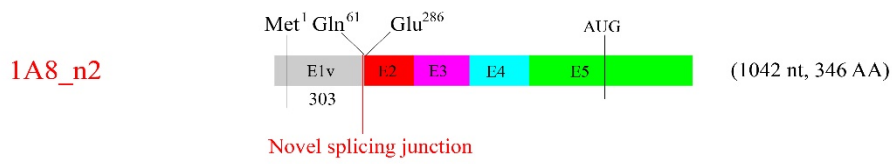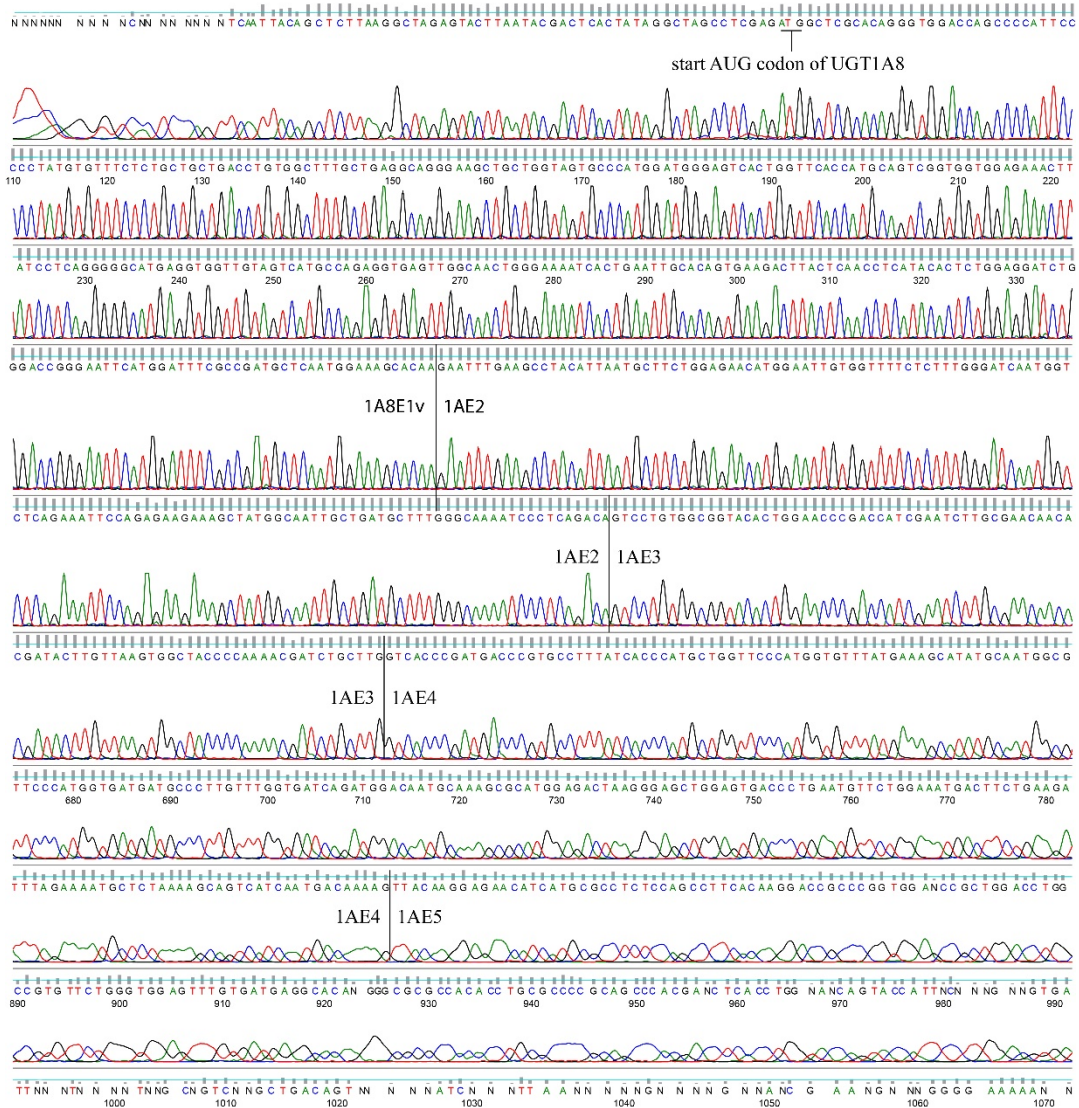

Supplemental Fig. 6

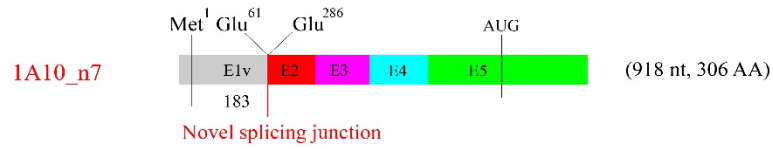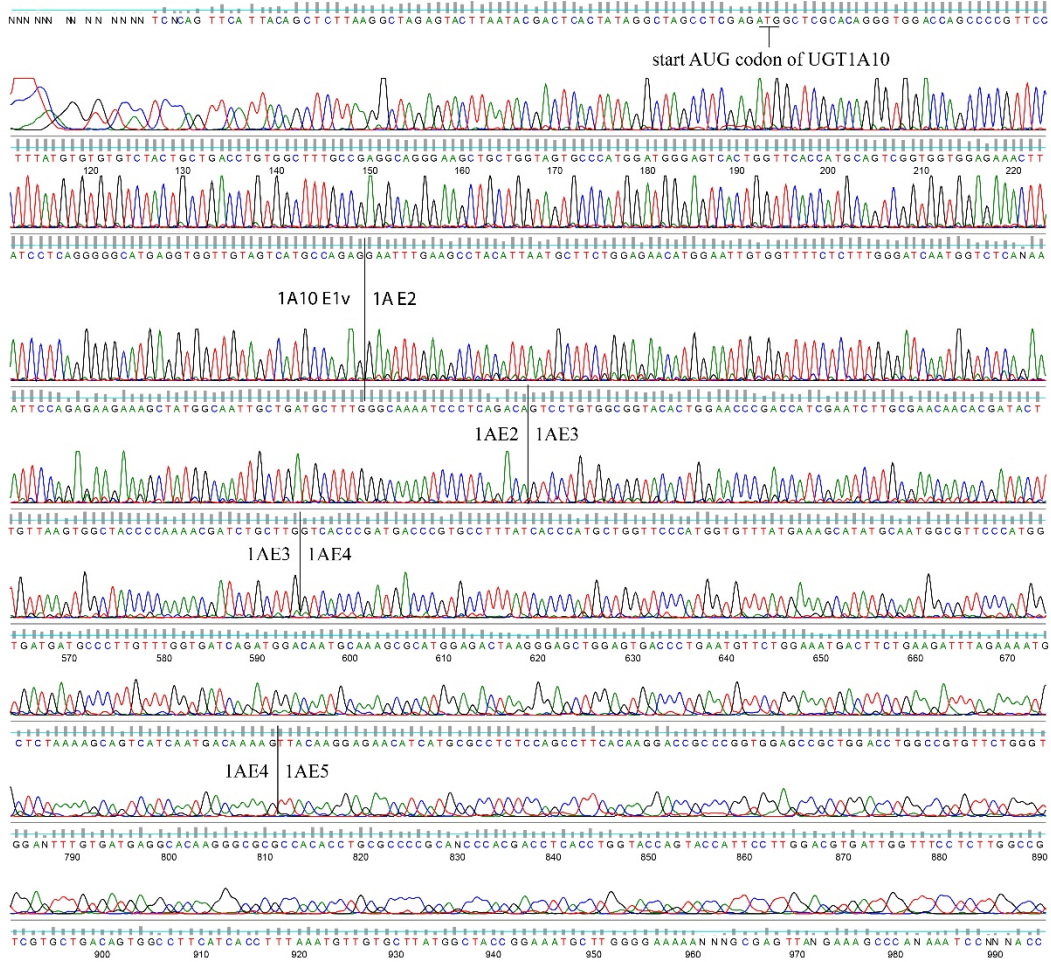

Supplemental Fig. 7

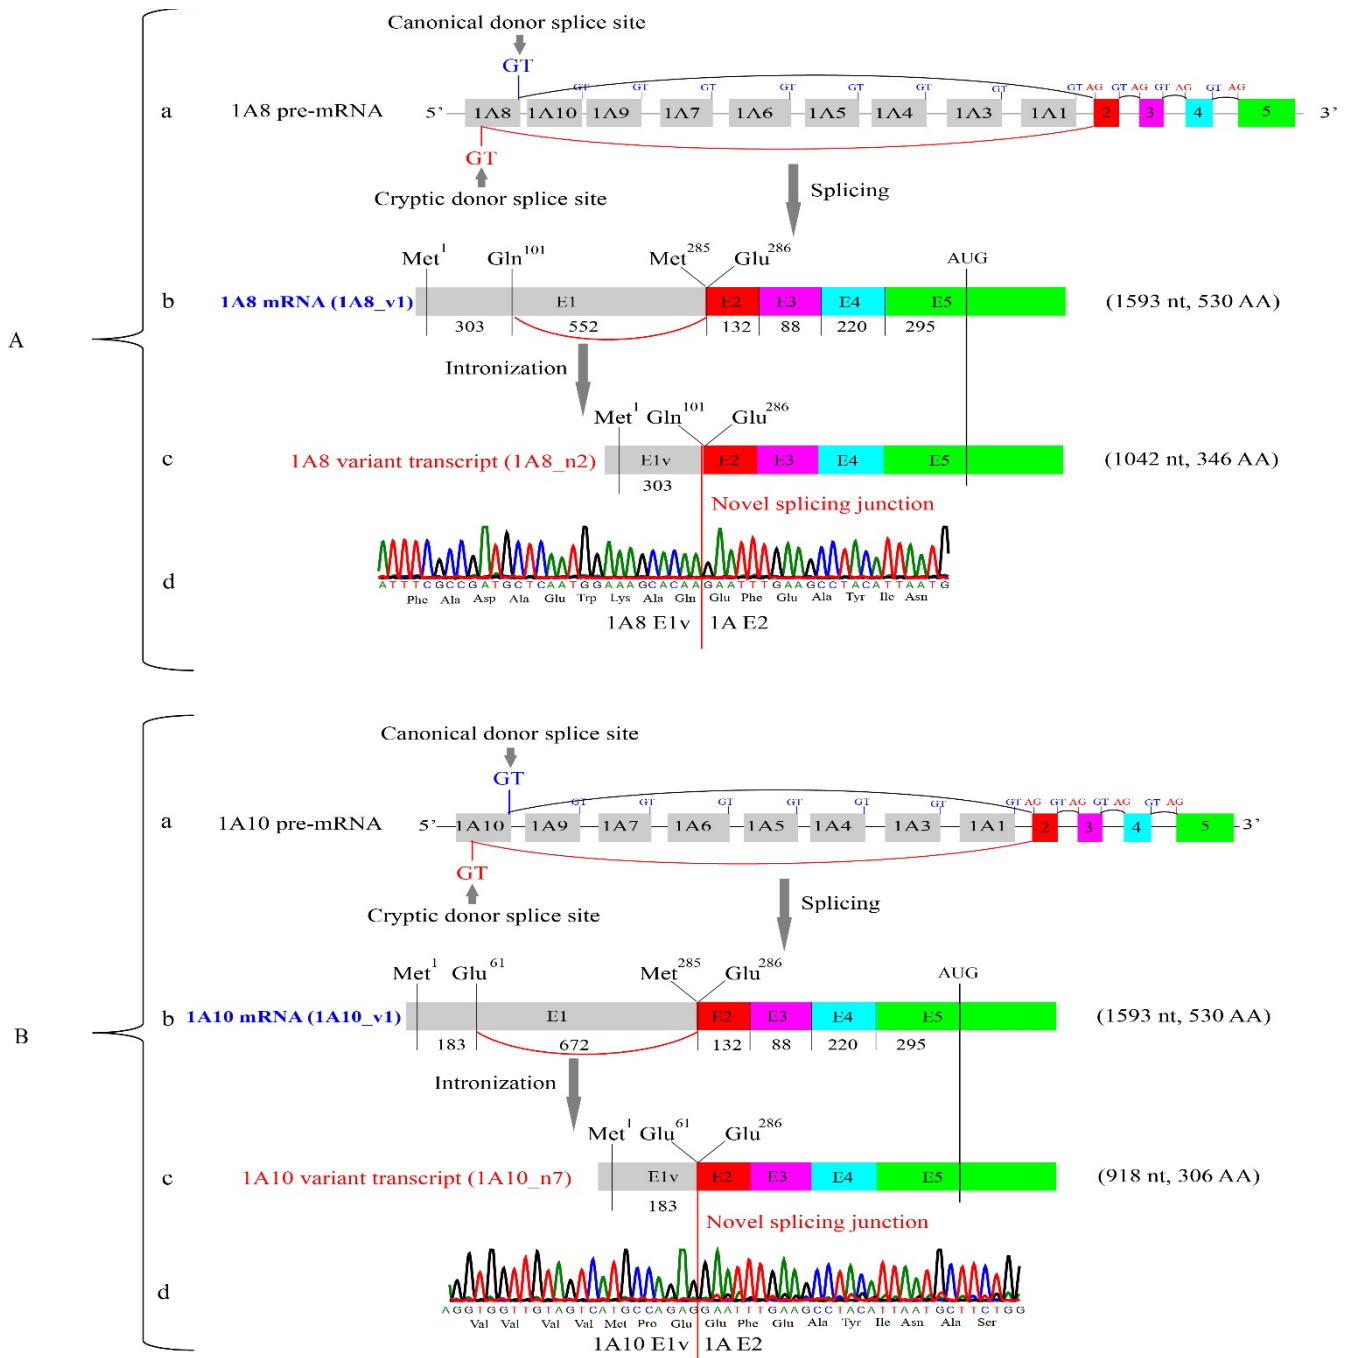

Supplemental Fig. 8

**Supplemental Table 7:** Known UGT1A transcripts and novel UGT1A variant transcripts identified in this study that are named using the current UGT1A nomenclature (Tourancheau A et al 2016)

|                    | NCBI RefSeq (mRNAs) | NCBI RefSeq (proteins) | Experimental validation of transcript expression |        |         |                                |                               |                  |   |
|--------------------|---------------------|------------------------|--------------------------------------------------|--------|---------|--------------------------------|-------------------------------|------------------|---|
|                    |                     |                        | Predicted proteins (aa)                          | RT-PCR | Cloning | CaptureSeq with UGT-enrichment | RNAseq without UGT enrichment | Western blotting |   |
| <b>UGT1A1</b>      | NM_000463.3         | NP_000454 (533 aa)     | 487                                              | √      | √       | √                              | √                             | √                | √ |
| UGT1A1_v1          |                     |                        |                                                  | √      | √       | √                              | √                             | √                | √ |
| UGT1A1_v2          |                     |                        |                                                  | √      | √       | √                              | √                             | √                | √ |
| UGT1A1_v3          |                     |                        |                                                  | √      | √       | √                              | √                             | √                | √ |
| <b>UGT1A1_n1*</b>  |                     |                        |                                                  | √      | √       | √                              | √                             | √                | √ |
| UGT1A1_n2          |                     |                        |                                                  | √      | √       | √                              | √                             | √                | √ |
| UGT1A1_n3          |                     |                        |                                                  | √      | √       | √                              | √                             | √                | √ |
| <b>UGT1A2P</b>     |                     |                        |                                                  | √      | √       | √                              | √                             | √                | √ |
| UGT1A2P_n1         |                     |                        |                                                  | √      | √       | √                              | √                             | √                | √ |
| UGT1A2P_n2         |                     |                        |                                                  | √      | √       | √                              | √                             | √                | √ |
| UGT1A2P_n3         |                     |                        |                                                  | √      | √       | √                              | √                             | √                | √ |
| UGT1A2P_n4         | √                   | √                      | √                                                | √      | √       | √                              |                               |                  |   |
| UGT1A2P_n5         | √                   | √                      | √                                                | √      | √       | √                              |                               |                  |   |
| UGT1A2P_n6         | √                   | √                      | √                                                | √      | √       | √                              |                               |                  |   |
| UGT1A2P_n7         | √                   | √                      | √                                                | √      | √       | √                              |                               |                  |   |
| UGT1A2P_n8         | √                   | √                      | √                                                | √      | √       | √                              |                               |                  |   |
| UGT1A2P_n9         | √                   | √                      | √                                                | √      | √       | √                              |                               |                  |   |
| <b>UGT1A2P_n10</b> | √                   | √                      | √                                                | √      | √       | √                              |                               |                  |   |
| <b>UGT1A2P_n11</b> | √                   | √                      | √                                                | √      | √       | √                              |                               |                  |   |
| <b>UGT1A3</b>      | NM_019093.4         | NP_061966 (534 aa)     | 239<br>309                                       | √      | √       | √                              | √                             | √                | √ |
| UGT1A3_v1          |                     |                        |                                                  | √      | √       | √                              | √                             | √                | √ |
| UGT1A3_v2          |                     |                        |                                                  | √      | √       | √                              | √                             | √                | √ |
| UGT1A3_v3          |                     |                        |                                                  | √      | √       | √                              | √                             | √                | √ |
| UGT1A3_n1          |                     |                        |                                                  | √      | √       | √                              | √                             | √                | √ |
| UGT1A3_n2          |                     |                        |                                                  | √      | √       | √                              | √                             | √                | √ |
| <b>UGT1A3_n3</b>   |                     |                        |                                                  | √      | √       | √                              | √                             | √                | √ |
| <b>UGT1A3_n4</b>   | √                   | √                      | √                                                | √      | √       | √                              |                               |                  |   |
| <b>UGT1A4</b>      | NM_007120.3         | NP_009051 (534 aa)     | 309                                              | √      | √       | √                              | √                             | √                | √ |
| UGT1A4_v1          |                     |                        |                                                  | √      | √       | √                              | √                             | √                | √ |
| UGT1A4_v2          |                     |                        |                                                  | √      | √       | √                              | √                             | √                | √ |
| UGT1A4_v3          |                     |                        |                                                  | √      | √       | √                              | √                             | √                | √ |
| UGT1A4_n1          |                     |                        |                                                  | √      | √       | √                              | √                             | √                | √ |
| UGT1A4_n2          |                     |                        |                                                  | √      | √       | √                              | √                             | √                | √ |
| UGT1A4_n3          |                     |                        |                                                  | √      | √       | √                              | √                             | √                | √ |
| <b>UGT1A4_n4</b>   | √                   | √                      | √                                                | √      | √       | √                              |                               |                  |   |
| <b>UGT1A5</b>      | NM_019078.2         | NP_061951 (534 aa)     | 309                                              | √      | √       | √                              | √                             | √                | √ |
| UGT1A5_v1          |                     |                        |                                                  | √      | √       | √                              | √                             | √                | √ |
| UGT1A5_v2          |                     |                        |                                                  | √      | √       | √                              | √                             | √                | √ |
| UGT1A5_v3          |                     |                        |                                                  | √      | √       | √                              | √                             | √                | √ |
| <b>UGT1A5_n1</b>   | √                   | √                      | √                                                | √      | √       | √                              |                               |                  |   |
| <b>UGT1A6</b>      | NM_001072.4         | NP_001063 (532 aa)     |                                                  | √      | √       | √                              | √                             | √                | √ |
| UGT1A6_v1          |                     |                        |                                                  | √      | √       | √                              | √                             | √                | √ |
| UGT1A6_v2          |                     |                        |                                                  | √      | √       | √                              | √                             | √                | √ |
| UGT1A6_v3          |                     |                        |                                                  | √      | √       | √                              | √                             | √                | √ |
| UGT1A6_n1          |                     |                        |                                                  | √      | √       | √                              | √                             | √                | √ |
| UGT1A6_n2          |                     |                        |                                                  | √      | √       | √                              | √                             | √                | √ |
| UGT1A6_n3          |                     |                        |                                                  | √      | √       | √                              | √                             | √                | √ |
| UGT1A6_n4          | √                   | √                      | √                                                | √      | √       | √                              |                               |                  |   |
| <b>UGT1A7</b>      | NM_019077.3         | NP_061950 (530 aa)     |                                                  | √      | √       | √                              | √                             | √                | √ |
| UGT1A7_v1          |                     |                        |                                                  | √      | √       | √                              | √                             | √                | √ |
| UGT1A7_v2          |                     |                        |                                                  | √      | √       | √                              | √                             | √                | √ |
| UGT1A7_v3          |                     |                        |                                                  | √      | √       | √                              | √                             | √                | √ |
| UGT1A7_n1          | √                   | √                      | √                                                | √      | √       | √                              |                               |                  |   |

|                    |             |                    |     |   |   |   |   |   |
|--------------------|-------------|--------------------|-----|---|---|---|---|---|
| <b>UGT1A9</b>      |             |                    |     |   |   |   |   |   |
| UGT1A9_v1          | NM_021027.3 | NP_066307 (530 aa) |     | √ | √ | √ |   | √ |
| UGT1A9_v2          |             |                    |     | √ | √ | √ |   | √ |
| UGT1A9_v3          |             |                    |     | √ | √ | √ |   | √ |
| UGT1A9_n1          |             |                    |     |   |   | √ |   |   |
| <b>UGT1A9_n2</b>   |             |                    | 346 |   |   |   | √ |   |
| <b>UGT1A10</b>     |             |                    |     |   |   |   |   |   |
| UGT1A10_v1         | NM_019075.4 | NP_061948 (530 aa) |     | √ | √ | √ |   | √ |
| UGT1A10_v2         |             |                    |     | √ | √ | √ |   | √ |
| UGT1A10_v3         |             |                    |     | √ | √ | √ |   | √ |
| UGT1A10_n4         |             |                    |     |   |   | √ |   |   |
| UGT1A10_n5         |             |                    |     |   |   | √ |   |   |
| UGT1A10_n6         |             |                    |     |   |   | √ |   |   |
| <b>UGT1A10_n7</b>  |             |                    | 306 | √ | √ |   | √ |   |
| <b>UGT1A8</b>      |             |                    |     |   |   |   |   |   |
| UGT1A8_v1          | NM_019076.5 | NP_061949 (530 aa) |     | √ | √ | √ |   | √ |
| UGT1A8_v2          |             |                    |     | √ | √ | √ |   | √ |
| UGT1A8_v3          |             |                    |     | √ | √ | √ |   | √ |
| UGT1A8_n1          |             |                    |     |   |   | √ |   |   |
| <b>UGT1A8_n2</b>   |             |                    | 346 | √ | √ |   | √ | √ |
| <b>Other UGT1A</b> |             |                    |     |   |   |   |   |   |
| UGT1A_n1           |             |                    |     |   |   | √ |   |   |
| UGT1A_n2           |             |                    |     |   |   | √ |   |   |
| UGT1A_n3           |             |                    |     |   |   | √ |   |   |
| UGT1A_n4           |             |                    |     |   |   | √ |   |   |
| UGT1A_n5           |             |                    |     |   |   | √ |   |   |
| UGT1A_n6           |             |                    |     |   |   | √ |   |   |
| UGT1A_n7           |             |                    |     |   |   | √ |   |   |
| UGT1A_n8           |             |                    |     |   |   | √ |   |   |
| <b>UGT1A_n9</b>    |             |                    |     |   |   |   | √ |   |
| <b>UGT1A_n10</b>   |             |                    |     |   |   |   | √ |   |
| <b>UGT1A_n11</b>   |             |                    |     |   |   |   | √ |   |
| <b>UGT1A_n12</b>   |             |                    |     |   |   |   | √ |   |
| <b>UGT1A_n13</b>   |             |                    |     |   |   |   | √ |   |
| <b>UGT1A_n14</b>   |             |                    |     |   |   |   | √ |   |
| <b>UGT1A_n15</b>   |             |                    |     |   |   |   | √ |   |
| <b>UGT1A_n16</b>   |             |                    |     |   |   |   | √ |   |
| <b>UGT1A_n17</b>   |             |                    |     |   |   |   | √ |   |
| <b>UGT1A_n18</b>   |             |                    |     |   |   |   | √ |   |
| <b>UGT1A_n19</b>   |             |                    |     |   |   |   | √ |   |
| <b>UGT1A_n20</b>   |             |                    |     |   |   |   | √ |   |
| <b>UGT1A_n21</b>   |             |                    |     |   |   |   | √ |   |
| <b>UGT1A_n22</b>   |             |                    |     |   |   |   | √ |   |

UGT1A transcripts highlighted in bold are reported in the present study and all others are reported by Tourancheau et al 2016 and several other studies (e.g. Levesque E et al 2007 and Giard H et al 2007). Also listed are the evidence for the synthesis of these transcripts in human tissues and cell lines from one or multiple experimental approaches, such as RT-PCR, Cloning, CaptureSeq, RNA-seq and Western Blotting assays. \* This variant was also previously described in Tourancheau et al 2016.
